# Supplementary material
Source: Springer Nature journal article supplement (https://www.springermedizin.de/resource/supplementary/13058_2004_956_MOESM1_ESM.pdf/9705726)

**(a)**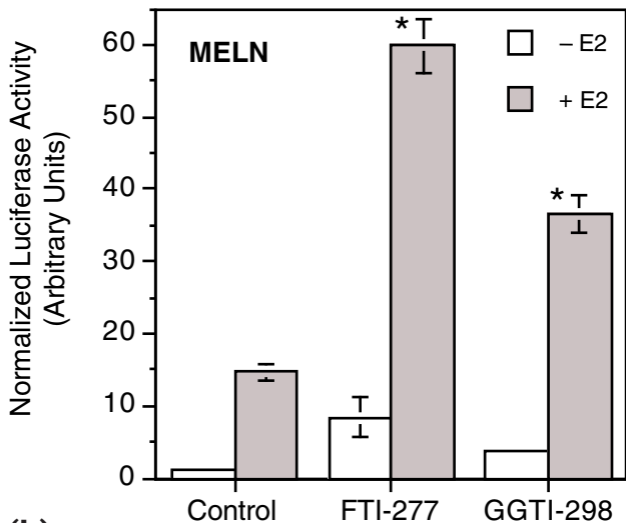**(b)**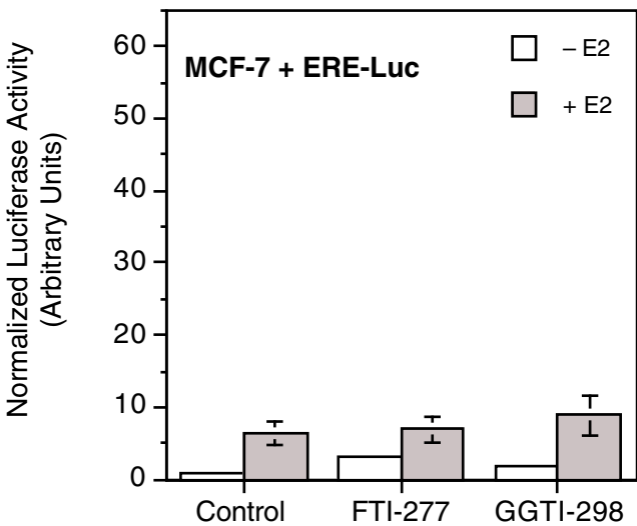

Supplement: MOESM1 [file 9705726]
